# Supplementary material for: Effect of Sulforaphane and 5-Aza-2’-Deoxycytidine on Melanoma Cell Growth
Source: Medicines (Basel). 2019 Jun 27;6(3):71. doi: 10.3390/medicines6030071 (PMC6789461; doi:10.3390/medicines6030071)
Supplement: Supplementary file 1 [file medicines-06-00071-s001.pdf]

# Supplementary Materials: Effect of Sulforaphane and 5-Aza-2'-Deoxycytidine on Melanoma Cell Growth

Tung-chin Chiang, Brian Koss, L. Joseph Su, Charity L. Washam, Stephanie D. Byrum, Aaron Storey and Alan J. Tackett

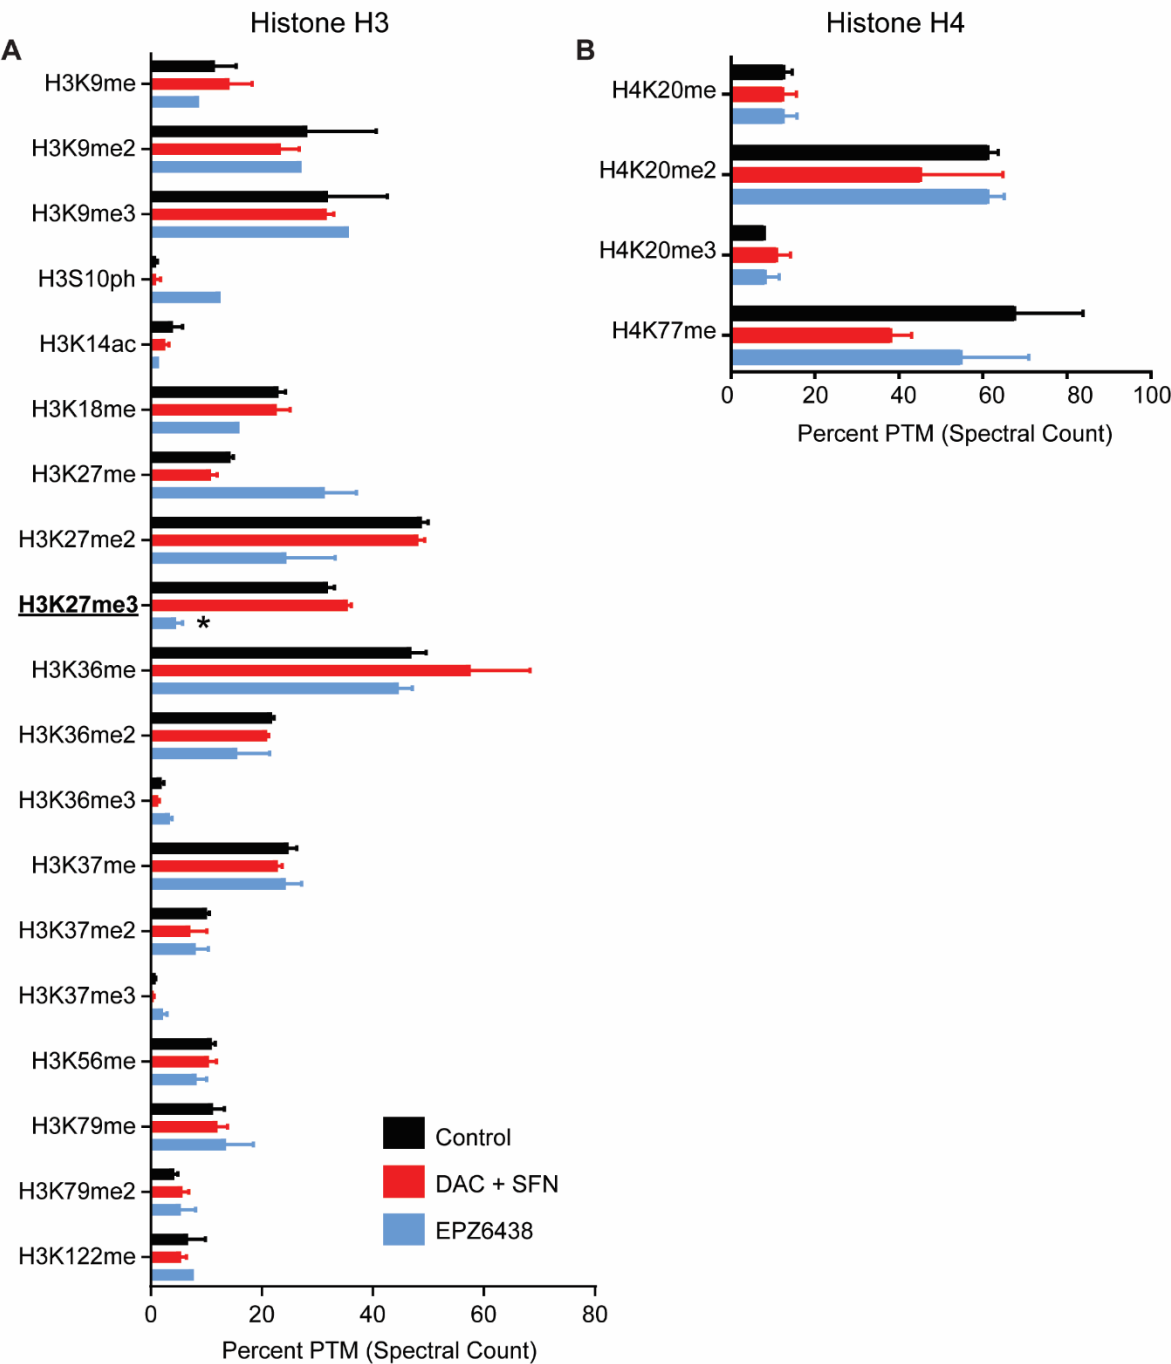

**Figure S1.** Histone post-translational modifications on Histone H3 (A) and H4 (B), were detected upon EPZ6438 treatment as well as SFN and DAC combination treatment. As anticipated for the positive control, H3K27me3 was significantly lower following EPZ treatment.
